# Supplementary material for: Learning the shape of coasts: automated detection of Quaternary paleo-landforms for the assessment of climatic-driven modifications in the south-Tyrrhenian
Source: Research Square preprint supplement (doi:10.21203/rs.3.rs-7319870/v1), 2025-08-25
Supplement: Supplementary file 1 [file 361aa3e73991a1fde14c8e8a.docx]

Table S1 - Table of morphometric parameter statistics for each lithology by dividing the seacliffs in two typologies (T1 – LIG paleo-seacliffs; T2 poly-cyclic seacliffs)

| T1 | | | | | | | |
| --- | --- | --- | --- | --- | --- | --- | --- |
| Lithology: 1-Turbidite | | | | | | | |
| Feature | Min | Q1 | Median | Q3 | Max | Mean | Std dev |
| dissection | 0.05 | 0.38 | 0.46 | 0.54 | 0.96 | 0.46 | 0.13 |
| roughness | 3.74 | 8.52 | 11.87 | 18.91 | 188.98 | 15.9 | 12.51 |
| slope | 10.78 | 19.51 | 22.7 | 27.86 | 59.48 | 24.23 | 6.79 |
| surfacearea | 102.67 | 106.09 | 108.4 | 113.12 | 196.88 | 110.88 | 7.71 |
| Lithology: 10-Sandstone | | | | | | | |
| Feature | Min | Q1 | Median | Q3 | Max | Mean | Std dev |
| dissection | 0.11 | 0.37 | 0.44 | 0.54 | 0.84 | 0.45 | 0.12 |
| roughness | 4.08 | 9.52 | 14.48 | 22.34 | 77.84 | 17.05 | 10.24 |
| slope | 13.93 | 20.64 | 24.89 | 30.01 | 47.37 | 25.44 | 6.38 |
| surfacearea | 103.03 | 106.86 | 110.24 | 115.48 | 147.66 | 111.79 | 6.63 |
| Lithology: 4-Dolomite | | | | | | | |
| Feature | Min | Q1 | Median | Q3 | Max | Mean | Std dev |
| dissection | 0.0 | 0.36 | 0.5 | 0.59 | 0.91 | 0.48 | 0.17 |
| roughness | 4.26 | 13.42 | 26.48 | 47.76 | 1043.2 | 45.3 | 66.9 |
| slope | 13.87 | 23.83 | 31.98 | 39.86 | 75.82 | 33.12 | 11.79 |
| surfacearea | 103.04 | 109.33 | 117.9 | 130.28 | 408.25 | 125.81 | 27.57 |
| Lithology: 6-Calcarenite | | | | | | | |
| Feature | Min | Q1 | Median | Q3 | Max | Mean | Std dev |
| dissection | 0.0 | 0.39 | 0.46 | 0.52 | 0.95 | 0.46 | 0.13 |
| roughness | 4.16 | 6.8 | 9.02 | 12.74 | 54.39 | 10.81 | 6.16 |
| slope | 12.33 | 17.58 | 20.12 | 23.53 | 42.42 | 21.02 | 4.78 |
| surfacearea | 102.36 | 104.9 | 106.5 | 109.07 | 144.2 | 107.65 | 4.17 |
| Lithology: 7-Marl | | | | | | | |
| Feature | Min | Q1 | Median | Q3 | Max | Mean | Std dev |
| dissection | 0.03 | 0.37 | 0.44 | 0.52 | 0.96 | 0.45 | 0.12 |
| roughness | 2.84 | 7.32 | 11.62 | 18.75 | 197.47 | 15.42 | 12.38 |
| slope | 11.58 | 18.18 | 22.54 | 27.79 | 59.86 | 23.78 | 7.09 |
| surfacearea | 102.08 | 105.25 | 108.27 | 113.03 | 199.16 | 110.58 | 7.73 |
| T2 | | | | | | | |
| Lithology: 1-Turbidite | | | | | | | |
| Feature | Min | Q1 | Median | Q3 | Max | Mean | Std dev |
| dissection | 0.0 | 0.4 | 0.49 | 0.57 | 0.98 | 0.48 | 0.14 |
| roughness | 2.89 | 10.11 | 15.5 | 25.43 | 262.19 | 20.39 | 16.34 |
| slope | 10.19 | 21.07 | 25.53 | 31.51 | 63.36 | 26.72 | 7.61 |
| surfacearea | 100.13 | 107.27 | 110.96 | 117.52 | 223.0 | 113.84 | 9.8 |
| Lithology: 10-Sandstone | | | | | | | |
| Feature | Min | Q1 | Median | Q3 | Max | Mean | Std dev |
| dissection | 0.0 | 0.36 | 0.42 | 0.48 | 0.93 | 0.42 | 0.12 |
| roughness | 2.59 | 7.62 | 12.34 | 19.4 | 89.09 | 15.65 | 11.44 |
| slope | 10.26 | 18.36 | 23.15 | 28.16 | 49.32 | 24.01 | 7.04 |
| surfacearea | 100.01 | 105.48 | 108.8 | 113.49 | 153.4 | 110.79 | 7.35 |
| Lithology: 4-Dolomite | | | | | | | |
| Feature | Min | Q1 | Median | Q3 | Max | Mean | Std dev |
| dissection | 0.0 | 0.39 | 0.52 | 0.61 | 1.0 | 0.49 | 0.19 |
| roughness | 2.42 | 14.91 | 26.28 | 53.32 | 1442.84 | 56.44 | 99.89 |
| slope | 8.24 | 24.85 | 31.57 | 40.94 | 77.95 | 34.08 | 12.55 |
| surfacearea | 100.01 | 110.61 | 118.13 | 134.68 | 478.83 | 130.86 | 37.54 |
| Lithology: 6-Calcarenite | | | | | | | |
| Feature | Min | Q1 | Median | Q3 | Max | Mean | Std dev |
| dissection | 0.02 | 0.24 | 0.4 | 0.58 | 1.0 | 0.42 | 0.21 |
| roughness | 0.15 | 7.04 | 8.16 | 18.25 | 86.32 | 15.63 | 16.67 |
| slope | 9.68 | 17.1 | 19.13 | 25.11 | 48.07 | 21.71 | 7.72 |
| surfacearea | 100.57 | 105.1 | 106.05 | 115.98 | 151.33 | 111.63 | 11.38 |
| Lithology: 7-Marl | | | | | | | |
| Feature | Min | Q1 | Median | Q3 | Max | Mean | Std dev |
| dissection | 0.0 | 0.37 | 0.45 | 0.53 | 0.95 | 0.44 | 0.13 |
| roughness | 0.38 | 7.39 | 11.86 | 21.85 | 301.06 | 18.42 | 19.72 |
| slope | 4.32 | 18.21 | 22.71 | 29.6 | 65.07 | 24.74 | 8.47 |
| surfacearea | 100.0 | 105.35 | 108.46 | 115.07 | 237.2 | 112.27 | 11.28 |

Table S2 - Numerical ranges (true prediction) of the various model features (morphometric values), aggregated by the lithology.

| Lithology | Math | DTM_elevat | roughness | slope | dissection | surface area | distance |
| --- | --- | --- | --- | --- | --- | --- | --- |
| LITHO-1 | MEAN | 18,89 | 18,63 | 25,57 | 0,37 | 113,66 | 23,05 |
|  | MAX | 126,29 | 66,97 | 45,63 | 0,76 | 143,58 | 106,91 |
|  | MIN | 3,47 | 3,95 | 14,03 | 0,13 | 103,07 | 0,00 |
| LITHO-4 | MEAN | 27,62 | 49,96 | 27,24 | 0,36 | 126,13 | 44,89 |
|  | MAX | 146,55 | 379,00 | 67,62 | 0,88 | 253,75 | 346,89 |
|  | MIN | 1,09 | 1,52 | 7,58 | 0,01 | 100,88 | 1,00 |
| LITHO-5 | MEAN | 43,43 | 42,11 | 36,67 | 0,39 | 128,33 | 146,54 |
|  | MAX | 150,41 | 89,57 | 45,91 | 0,68 | 157,96 | 467,25 |
|  | MIN | 11,22 | 17,78 | 27,27 | 0,25 | 112,50 | 5,39 |
| LITHO-6 | MEAN | 12,56 | 7,31 | 12,69 | 0,40 | 105,80 | 142,55 |
|  | MAX | 26,60 | 55,47 | 42,06 | 0,57 | 135,63 | 816,08 |
|  | MIN | 2,06 | 0,28 | 3,68 | 0,16 | 100,21 | 6,71 |
| LITHO-7 | MEAN | 11,54 | 14,47 | 22,46 | 0,28 | 110,85 | 33,16 |
|  | MAX | 48,64 | 75,07 | 45,02 | 0,71 | 148,30 | 148,25 |
|  | MIN | 2,39 | 2,14 | 9,80 | 0,13 | 101,62 | 2,83 |
| LITHO-10 | MEAN | 6,40 | 9,93 | 17,52 | 0,35 | 107,93 | 18,31 |
|  | MAX | 16,66 | 35,20 | 36,44 | 0,61 | 125,64 | 34,29 |
|  | MIN | 1,41 | 0,44 | 4,01 | 0,19 | 100,33 | 0,00 |
