# Supplementary material for: Learning the shape of coasts: automated detection of Quaternary paleo-landforms for the assessment of climatic-driven modifications in the south-Tyrrhenian
Source: Research Square preprint supplement (doi:10.21203/rs.3.rs-7319870/v1), 2025-08-25
Supplement: Supplementary file 2 [file 6f031b38d64a9579e0c9a03c.docx]

**GIS terrain analysis**

Terrain analysis tools applied to a DEM allow calculating geo-information for each single cell known as terrain derivatives whose processing allows classifications/identifications of specific features, as well as geomorphological assessments of the territory [1].

The terrain derivatives calculated in this research were obtained both by using the spatial analysis toolbox and the Geomorphometry and Gradient metrics toolbox [2] in ArcMAP:

- Slope: It is the rate of maximum change in z-value from each cell. We calculated this metric in degrees, so it varies between 0 and 90.
- Euclidean distance from the coastline: It is the length of the line segment between two points. In this case, we calculated, for each cell, the Euclidean distance to the closest point of the coastline.
- Surface Area Ratio (SAR, here in named as “Surface area”) is obtained using triangulated irregular networks (TINs) calculated from DEMs and planar area calculated from the analysis window of the DEM [2-5]
- Roughness: Known also as Terrain Ruggedness Index (TRI) [6-8], it is a focal cell statistic of the variance in elevation values of neighbouring cells within a window defined by the user [2,5], in this case we chose a 3x3 one.
- Dissection: It is a measure meant to describe a cell configuration relative to the surrounding ones, giving an idea of how a land surface is cut up by eroding streams within a user-defined window [2,5,9-10]. Martonne modified dissection is implemented in the toolbox and calculated as:

Where z is the elevation, i is the focal cell, and s is the analysis window size. As the roughness, the dissection was calculated for a 3x3 window.

**References**

1. Schillaci, C. & Braun, A. Terrain analysis and landform recognition. Geomorphol. Tech. 1–18 (2015).
2. Evans, J. S., Oakleaf, J. & Cushman, S. A. An ArcMAP Toolbox for Surface Gradient and Geomorphometric Modeling. <https://github.com/jeffreyevans/GradientMetrics> (accessed 26 Dec 2024).
3. Berry, J. K. Beyond mapping use surface area for realistic calculations. Geo World **15**, 20–21 (2002).
4. Jenness, J. S. Calculating landscape surface area from digital elevation models. Wildl. Soc. Bull. **32**, 829–839 (2004).
5. Ironside, K. E. et al. Geomorphometry in landscape ecology: Issues of scale, physiography, and application. Environ. Ecol. Res. **6**, 397–412 (2018).
6. Riley, S. J. Integration of environmental, biological, and human dimensions for management of mountain lions (Puma concolor) in Montana. PhD Thesis, Cornell Univ. (1998).
7. Riley, S. J. & Malecki, R. A. A landscape analysis of cougar distribution and abundance in Montana, USA. Environ. Manag. **28**, 317–323 (2001).
8. Riley, S. J., DeGloria, S. D. & Elliot, R. Index that quantifies topographic heterogeneity. Intermt. J. Sci. **5**, 23–27 (1999).
9. Sarma, P. K., Sarmah, K., Chetri, P. K. & Sarkar, A. Geospatial study on morphometric characterization of Umtrew River basin of Meghalaya, India. Int. J. Water Resour. Environ. Eng. **5**, 489–498 (2013).
10. Berila, A. & Isufi, F. Determination of dissection index (DI) using GIS & RS techniques: A case study on Drenica River Basin. **Folia Geogr.** **63**, 5 (2021).
